# Supplementary material
Source: PubMed Central journal article supplement (PMC4111128)
Supplement: NIHMS377798-supplement-supplement_1.pdf [file NIHMS377798-supplement-supplement_1.pdf]

### Supplemental Material

Since the sample of participants who completed both the Reappraisal and Affect Label tasks is small ( $N = 10$ ), additional data are presented here in an effort to show that data from the present sample are representative of, and show similar patterns of effects as, the larger samples from which participants were drawn. In their individual studies, a total of 17 healthy participants completed the Reappraisal task (Control group in Baicy, 2008), and 23 healthy participants completed the Affect Label task (Control group in Payer et al., 2011). Amygdala ROI and PPI analyses were performed for all participants as described in the Methods. For the large samples, PPI analyses were assessed at a threshold of  $p < .005$ , uncorrected, with a 50-voxel cluster minimum. PPI analysis for the Reappraisal task showed connectivity with the amygdala in a 60-voxel cluster in the right inferior frontal gyrus (IFG) ( $x, y, z$  (mm) = 58, 24, 32; peak  $t = 4.51$ ,  $p < .001$ ). PPI analysis for the Affect Label task showed connectivity with the amygdala in two clusters in the right IFG (cluster 1: 111 voxels;  $x, y, z$  (mm) = 54, 38, 16; peak  $t = 4.81$ ,  $p < .001$ ; cluster 2: 209 voxels;  $x, y, z$  (mm) = 44, 20, 30; peak  $t = 3.47$ ,  $p < .001$ ). Within these clusters, effects shown by the present sub-sample were assessed. Results are presented in Supplementary Table 1, and suggest that sub-sample data are comparable to the original results.

Baicy, K. (2008). *Dissociation between neural processing and negative emotion in methamphetamine dependence*. Ph.D. Dissertation. Ph.D., University of California, Los Angeles, CA.

Payer, D. E., Lieberman, M. D., & London, E. D. (2011). Neural correlates of affect processing and aggression in methamphetamine dependence. *Archives of General Psychiatry*, *68*(3), 271-282.

Supplementary Table 1.

|                                                                              | <b>Full sample<br/>completing<br/>Reappraisal task<br/>(N = 17)</b> | <b>Full sample<br/>completing Affect<br/>Label task<br/>(N = 23)</b> | <b>Present sample<br/>(N = 10)</b> |
|------------------------------------------------------------------------------|---------------------------------------------------------------------|----------------------------------------------------------------------|------------------------------------|
| <b>Number of males / females</b>                                             | 7 / 10                                                              | 10 / 13                                                              | 4 / 6                              |
| <b>Age, years (M, SD)</b>                                                    | 31.5 (9.84)<br>Range = 21 - 50                                      | 28.4 (8.12)<br>Range = 19 - 46                                       | 27.6 (8.09)<br>Range = 21 - 43     |
| <b>Education, years (M, SD)</b>                                              | 14.5 (1.55)<br>Range = 12 - 17                                      | 14.4 (1.75)<br>Range = 12 - 18                                       | 14.6 (1.27)<br>Range = 12 - 16     |
| <b>Reappraisal: Activation in IFG<br/>cluster (average across voxels)</b>    | t = 2.17, p = .017                                                  |                                                                      | t = 1.59, p = .065                 |
| <b>Affect Label: Activation in IFG<br/>cluster 1 (average across voxels)</b> |                                                                     | t = 4.06, p < .001                                                   | t = 4.90, p < .001                 |
| <b>Affect Label: Activation in IFG<br/>cluster 2 (average across voxels)</b> |                                                                     | t = 3.31, p < .001                                                   | t = 3.62, p < .001                 |
| <b>Reappraisal: Amygdala<br/>activation (parameter estimates)</b>            |                                                                     |                                                                      |                                    |
| Look, M (SD)                                                                 | .147 (1.41)                                                         |                                                                      | .393 (1.39)                        |
| Decrease, M (SD)                                                             | -.160 (1.39)                                                        |                                                                      | -.046 (1.49)                       |
| Test for difference                                                          | t(16) = 3.04, p = .008                                              |                                                                      | t(9) = 3.41, p = .008              |
| <b>Affect Label: Amygdala<br/>activation (parameter estimates)</b>           |                                                                     |                                                                      |                                    |

|                     |  |                          |                         |
|---------------------|--|--------------------------|-------------------------|
| Match, M (SD)       |  | .480 (.255)              | .573 (.280)             |
| Label, M (SD)       |  | .357 (.248)              | .369 (.226)             |
| Test for difference |  | $t(22) = 1.81, p = .085$ | $t(9) = 3.04, p = .014$ |
